# Supplementary material
Source: HighWire-hosted journal article supplement (https://www.ajnr.org/content/suppl/2008/10/13/ajnr.A1309)
Supplement: 1309_tables.pdf [file 1309_tables.pdf]

**On-line Table 1: Selected sections and landmarks used for brain metrics**

| Measure (see landmarks 1–8 in Fig 1)                    | Section      | Landmark                                                                                                                                                                   |
|---------------------------------------------------------|--------------|----------------------------------------------------------------------------------------------------------------------------------------------------------------------------|
| Tissue measures                                         |              |                                                                                                                                                                            |
| 1, Bifrontal diameter                                   | Coronal T2W  | Level of the olfactory sulci, 4 teeth apparent, maximal distance perpendicular to the interhemispheric fissure                                                             |
| 2a, b, Frontal lobe height left, right                  | Coronal T2W  | Similar to 1, level of the gyrus rectus                                                                                                                                    |
| 3a, Brain biparietal diameter                           | Coronal T2W  | Level of the third ventricle, cochlea, and basilar truncus apparent                                                                                                        |
| 3b, Bone biparietal diameter                            | Coronal T2W  | Level of the third ventricle, cochlea, and basilar truncus apparent, inner limits of the skull                                                                             |
| 8, Transverse cerebellar diameter                       | Coronal T2W  | Level of the atria (plexus choroid apparent), maximal horizontal distance                                                                                                  |
| 9, Fronto-occipital diameter                            | Sagittal T1W | Midline, maximal distance from the anterior to the posterior edge of the brain                                                                                             |
| 10, Length of the corpus callosum                       | Sagittal T1W | Midline from the genu to the posterior extremity of the splenium                                                                                                           |
| 11, Surface of the vermis                               | Sagittal T1W | Midline                                                                                                                                                                    |
| Fluid measures                                          |              |                                                                                                                                                                            |
| Extra-axial space                                       |              |                                                                                                                                                                            |
| 4a, b, Craniocaudal interopercular distance left, right | Coronal T2W  | Level of the third ventricle of biparietal diameter                                                                                                                        |
| 5, Interhemispheric distance                            | Coronal T2W  | Level of the third ventricle                                                                                                                                               |
| Intracerebral space                                     |              |                                                                                                                                                                            |
| 6, Third ventricle                                      | Coronal T2W  | Level of the third ventricle                                                                                                                                               |
| 7a, b, Right and left lateral ventricle atrial diameter | Coronal T2W  | Level of the atria (plexus choroid apparent) on an axis perpendicular to that of the ventricle at midheight of the ventricle size (same as transverse cerebellar diameter) |

**Note:**—T2W indicates T2-weighted; T1W, T1-weighted; cf, compared with.

**On-line Table 2: Characteristics of the preterm and full-term cohort**

| Characteristic                                        | Preterm    | Term       |
|-------------------------------------------------------|------------|------------|
| No.                                                   | 189        | 36         |
| Gestational age at birth (weeks), mean (SD)           | 27.5 (1.9) | 38.9 (1.2) |
| Gestational age at MRI (weeks), mean (SD)             | 40 (1.3)   | 40.3 (1.3) |
| Birth weight (g), mean (SD)                           | 969 (225)  | 3277 (524) |
| Weight at MRI (g), mean (SD)                          | 3005 (551) | 3482 (482) |
| Head circumference at MRI (cm), mean (SD)*            | 34.9 (2.1) | 36 (1.4)   |
| No. of males (%)                                      | 97 (51)    | 19 (53)    |
| No. of multiple birth infants (%)                     | 80 (42)    | 2 (5.6)    |
| No. of intrauterine growth restrictions (%)           | 21 (11)    | 1 (3)      |
| No. of white matter injuries (%)                      |            |            |
| No                                                    | 71 (37.6)  | 0          |
| Mild                                                  | 84 (44.4)  | 0          |
| Moderate                                              | 27 (14.3)  | 0          |
| Severe                                                | 7 (3.7)    | 0          |
| No. of Intraventricular hemorrhages, grade 3 or 4 (%) | 7 (3.7)    | 0          |

**Note:**—MRI indicates MR imaging.

\* Two missing.

**On-line Table 3: ICC for intra- and interobserver reliability**

|                                | Intraobserver ICC (95% CI) | Interobserver ICC (95% CI) |
|--------------------------------|----------------------------|----------------------------|
| Bifrontal diameter             | 0.912 (0.660–0.979)        | 0.831 [(0.594–0.95)        |
| Left frontal height            | 0.901 (0.623–0.977)        | 0.828 (0.588–0.949)        |
| Right frontal height           | 0.892 [(0.595–0.974)       | 0.787 [(0.51–0.936)        |
| Brain biparietal diameter      | 0.988 (0.946–0.974)        | 0.976 (0.933–0.994)        |
| Bone biparietal diameter       | 0.998 (0.989–0.999)        | 0.99 (0.972–0.997)         |
| Transverse cerebellar diameter | 0.992 (0.967–0.998)        | 0.899 (0.738–0.971)        |
| Interhemispheric fissure       | 0.93 (0.723–0.984)         | 0.282 (–0.093–0.702)       |
| Third ventricle                | 0.626 (–0.010–0.901)       | 0.396 (0.004–0.769)        |
| Left lateral ventricle         | 0.774 (0.277–0.944)        | 0.332 (–0.053–0.733)       |
| Right lateral ventricle        | 0.683 (0.091–0.919)        | 0.011 (–0.275–0.485)       |

**Note:**—ICC indicates intraclass correlation coefficients.

**On-line Table 4: Comparison of brain metrics between preterm and term infants**

|                                                                                 | Preterm |        |     | Term |       |     | Preterm-Term Differences |                |         |
|---------------------------------------------------------------------------------|---------|--------|-----|------|-------|-----|--------------------------|----------------|---------|
|                                                                                 | No.     | Mean   | SD  | No.  | Mean  | SD  | (%)                      | 95% CI         | P       |
| Bifrontal diameter (mm)                                                         | 189     | 64     | 4.6 | 36   | 72.5  | 4.7 | -11.6                    | -13.8 to -9.3  | <.001** |
| Left frontal height (mm)                                                        | 189     | 47.5   | 5   | 36   | 49.3  | 6   | -3.65                    | -7.45 to 0.16  | .06     |
| Right frontal height (mm)                                                       | 189     | 47.7   | 5.1 | 36   | 49.8  | 6.3 | -4.4                     | -8.2 to -0.5   | .026*   |
| Brain biparietal diameter (mm)                                                  | 189     | 75.1   | 5   | 36   | 85.3  | 4.6 | -10.17                   | -14 to -9.8    | <.001** |
| Bone biparietal diameter (mm)                                                   | 189     | 79.5   | 5.5 | 36   | 89.3  | 4.3 | -11.1                    | -13.2 to -8.9  | <.001** |
| Transverse cerebellar diameter (mm)                                             | 189     | 50.8   | 3.3 | 36   | 55.6  | 2.6 | -8.7                     | -10.47 to -6.9 | <.001** |
| Fronto-occipital diameter (mm)                                                  | 73*     | 108.97 | 7.2 | 13   | 109.3 | 4   | -0.3                     | -2.9-2.3       | .87     |
| Surface of the vermis (mm <sup>2</sup> )                                        | 74*     | 428.2  | 71  | 13   | 428.4 | 48  | -0.07                    | -9.7-9.5       | .989    |
| Length of corpus callosum (mm)                                                  | 72*     | 42     | 4.2 | 13   | 42    | 3.8 | -0.4                     | -5.852-5.042   | .98     |
| Interhemispheric fissure (mm)                                                   | 189     | 3.4    | 1.6 | 36   | 2.7   | 1   | +29.2                    | 14.2-44.2      | .005*   |
| Extra-axial space (biparietal bone diameter-<br>biparietal brain diameter) (mm) | 189     | 4.28   | 1.7 | 36   | 3.99  | 2.4 | +7.2                     | -9.5-23.9      | .395    |
| Third ventricle (mm)                                                            | 189     | 2.9    | 0.9 | 36   | 3     | 0.8 | 2.5                      | -9.3 to 14     | .675    |
| Interopercular distance Left (mm)                                               | 189     | 1.96   | 0.8 | 36   | 1.91  | 0.7 | -4.1                     | -18.5 to 10.3  | .726    |
| Interopercular distance Right (mm)                                              | 189     | 1.7    | 0.6 | 36   | 1.9   | 0.9 | -10.75                   | -25.2 to 3.7   | .176    |
| Left lateral ventricle (mm)                                                     | 189     | 7      | 3.3 | 36   | 5.7   | 1.5 | +22.3                    | 2.94 to 41.7   | .006*   |
| Right lateral ventricle (mm)                                                    | 189     | 6.5    | 2.8 | 36   | 5.8   | 1.6 | +11.7                    | -4.68 to 28.1  | .146    |

\* Good quality sagittal sections were not available for the entire cohort.

**On-line Table 5: Multivariate analysis by linear regression, studying the effects of the study group (full-term infants as reference group), sex (female as reference group), and GA at MR imaging on brain metrics (unstandardized regression coefficients and 95 % CIs)**

| Brain Measure                  | Preterm Group         | GA at MRI<br>(per week) | Male              | % Variance<br>Explained |
|--------------------------------|-----------------------|-------------------------|-------------------|-------------------------|
| Bifrontal diameter             | -7.7 (-9.2 to -6.2)†  | 1.1 (0.6-1.5)†          | 2.4 (1.4-3.5)†    | 42.5                    |
| Biparietal diameter            | -9.3 (-11.0 to -7.7)† | 1.4 (0.9-1.9)†          | 1.6 (0.4-2.8)†    | 46.5                    |
| Transverse cerebellar diameter | -4.1 (-5.1 to -3.1)†  | 1.3 (1.0-1.6)†          | 0.4 (-0.3-1.1)    | 44.2                    |
| Fronto-occipital diameter      | 0.2 (-0.4-0.4)        | 1.6 (0.05-0.3)*         | 0.16 (-0.1-0.4)   | 7.9                     |
| Corpus callosum length         | 0.01 (-0.22-0.23)     | 0.06 (-0.002-0.13)      | 0.05 (-0.12-0.21) | 1.7                     |

Note:—GA indicates gestational age.

\*  $P < .05$ .

†  $P < .001$ .

**On-line Table 6: Correlation coefficients between brain metrics, head circumference, and volumetric data**

|                           | Tissue Measures       |                           |                            |                                 |                                      | Fluid Measures |                                |                               |                    |
|---------------------------|-----------------------|---------------------------|----------------------------|---------------------------------|--------------------------------------|----------------|--------------------------------|-------------------------------|--------------------|
|                           | Bifrontal<br>Diameter | Left<br>Frontal<br>Height | Right<br>Frontal<br>Height | Brain<br>Biparietal<br>Diameter | Transverse<br>Cerebellar<br>Diameter | IHD            | Right<br>Ventricle<br>Diameter | Left<br>Ventricle<br>Diameter | Third<br>Ventricle |
| Total tissue (no CSF)     | 0.663†                | 0.357†                    | 0.331†                     | 0.626†                          | 0.707†                               | 0.027          | 0.079                          | -0.034                        | 0.234†             |
| Cortical gray matter      | 0.482†                | 0.144*                    | 0.132                      | 0.538†                          | 0.658†                               | 0.018          | 0.048                          | -0.049                        | 0.133              |
| Myelinated white matter   | 0.023                 | -0.030                    | -0.038                     | 0.103                           | 0.112                                | -0.070         | 0.093                          | 0.076                         | 0.126              |
| Unmyelinated white matter | 0.589†                | 0.455†                    | 0.421†                     | 0.446†                          | 0.441†                               | 0.037          | 0.099                          | 0.016                         | 0.247†             |
| Basal ganglia             | 0.413†                | 0.325†                    | 0.319†                     | 0.371†                          | 0.427†                               | 0.006          | -0.204†                        | -0.247†                       | 0.053              |
| CSF                       | 0.088                 | 0.111                     | 0.108                      | 0.135                           | 0.082                                | 0.478†         | 0.482†                         | 0.481†                        | 0.520†             |
| Head circumference        | 0.549†                | 0.279†                    | 0.239†                     | 0.465†                          | 0.558†                               | 0.216†         | 0.168*                         | 0.09                          | 0.312†             |

Note:—IHD indicates interhemispheric distance.

\* Correlation is significant at the 0.05 level (2-tailed).

† Correlation is significant at the 0.01 level (2-tailed).
